# Supplementary material
Source: publisher figshare collection journal article supplement (https://acs.figshare.com/ndownloader/files/12254261)
Supplement: Supplementary file 1 [file 12254261]

## Supporting Information

### Molecular Dynamics of Polyfarnesene

Ciprian Iacob<sup>\*,†, #</sup> Taejun Yoo,<sup>‡</sup> James Runt<sup>\*,†</sup>

<sup>†</sup> Department of Materials Science and Engineering, The Pennsylvania State University,  
University Park, PA 16802 USA

<sup>#</sup> National Research and Development Institute for Cryogenic and Isotopic Technologies, ICSI  
Rm. Valcea, Romania

<sup>‡</sup> Total, Exxon R&D Research Center, 665 Stockton Dr., Exton, PA, 19341 USA

### AUTHOR INFORMATION

Corresponding Author \*email: [runt@matse.psu.edu](mailto:runt@matse.psu.edu)

\*email: [ciprian.iacob@icsi.ro](mailto:ciprian.iacob@icsi.ro)

## 1. Rheology

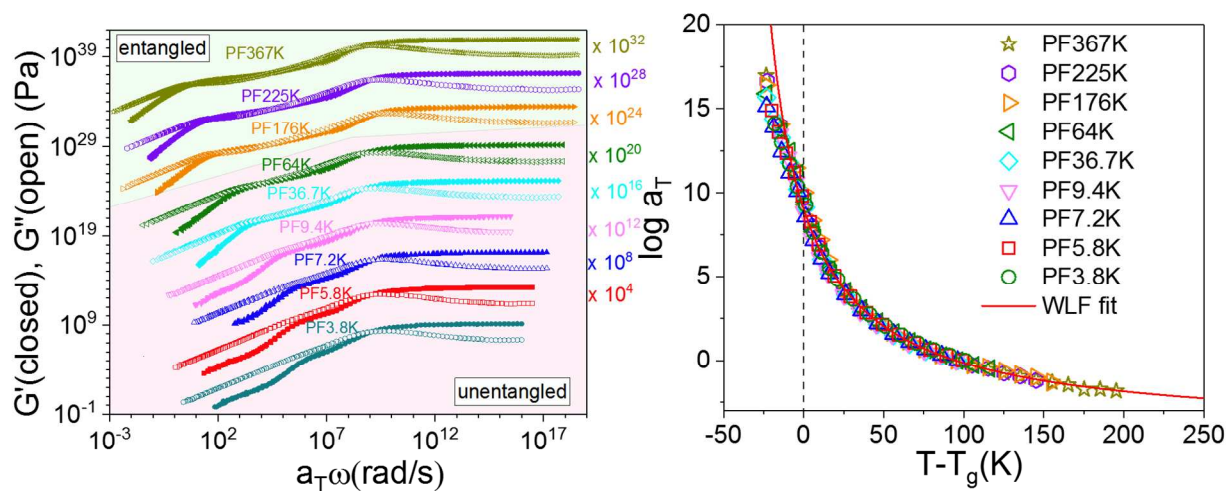

**Figure S.1:** (a) Dynamic master curves of storage and loss moduli for all PF samples from the terminal region to the glassy state at a reference temperature of  $T_{\text{ref}} = 293\text{K}$ . Curves are shifted using the indicated vertical scale factors. The entangled and unentangled polymers are also indicated by different color shading. (b) Frequency shift factors ( $a_T$ ) used to generate the master curves as a function of  $T - T_g$ . The frequency shift factors are well fitted by the WLF equation, as indicated.

## 2. Dielectric spectroscopy

**Table S1. VFT fitting parameters for the dielectric  $\alpha$  relaxations and  $T_g$  BDS**

| Sample ID | $\omega_\infty$ | B    | $T_0 \pm 2$ K | $T_{g \text{ BDS}} \text{ (K)}$ |
|-----------|-----------------|------|---------------|---------------------------------|
| PF3.8K    | 1.3E10          | 3.34 | 172           | 192                             |
| PF5.8K    | 1.49E10         | 3.47 | 172           | 194                             |
| PF7.2K    | 1.84E10         | 3.53 | 173           | 195                             |
| PF9.4K    | 2.1E9           | 2.3  | 182           | 198                             |
| PF36.7K   | 1.4E10          | 3.4  | 175           | 196                             |
| PF64K     | 5.2E13          | 10.6 | 150           | 195                             |
| PF176K    | 9.7E12          | 8.7  | 156           | 196                             |
| PF225K    | 6.6E10          | 4.2  | 173           | 198                             |
| PF367K    | 1.25e10         | 3.4  | 177           | 200                             |

## 3. Density

The densities,  $\rho$ , for all PF samples were determined at room temperature using a high-precision helium pycnometer (AccuPyc II 1340, Micrometrics Instrument. Corporation). The sample chamber was calibrated with different density standards before running each measurement. Prior to measurement, all samples were carefully dried and purged in order to

avoid the influence of moisture and adsorbed impurities. The reported values of density represent an average of ten consecutive measurements with a standard deviation less than 0.0003 g/ cm<sup>3</sup>.

**Table S2: Weight average molecular weights and densities for PF under study.**

| Sample  | M <sub>w</sub> (g/mol) | Density (g/cm <sup>3</sup> ) | Density deviation (g/cm <sup>3</sup> ) |
|---------|------------------------|------------------------------|----------------------------------------|
| PF3.8K  | 3,800                  | 0.8920                       | 0.0001                                 |
| PF5.8K  | 5,800                  | 0.8952                       | 0.0002                                 |
| PF7.2K  | 7,200                  | 0.8940                       | 0.0002                                 |
| PF9.4K  | 9,400                  | 0.8963                       | 0.0002                                 |
| PF36.7K | 36,700                 | 0.8977                       | 0.0001                                 |
| PF64K   | 64,000                 | 0.9018                       | 0.0002                                 |
| PF176K  | 176,200                | 0.9019                       | 0.0001                                 |
| PF225K  | 225,400                | 0.9021                       | 0.0002                                 |
| PF367K  | 367,100                | 0.9020                       | 0.0003                                 |
